# Supplementary material for: Simultaneous Determination of Protein Structure and Dynamics Using Cryo-Electron Microscopy
Source: PubMed Central journal article supplement (PMC5954442; doi:10.1016/j.bpj.2018.02.028), 2018-04-10
Supplement: mmc2.pdf [file mmc2.pdf]

# Simultaneous Determination of Protein Structure and Dynamics Using Cryo-Electron Microscopy

Massimiliano Bonomi,<sup>1,\*</sup> Riccardo Pellarin,<sup>2</sup> and Michele Vendruscolo<sup>1,\*</sup>

<sup>1</sup>Department of Chemistry, University of Cambridge, Cambridge, United Kingdom and <sup>2</sup>Structural Bioinformatics Unit, Institut Pasteur, CNRS UMR 3528, Paris, France

**ABSTRACT** Cryo-electron microscopy is rapidly emerging as a powerful technique to determine the structures of complex macromolecular systems elusive to other techniques. Because many of these systems are highly dynamical, characterizing their movements is also a crucial step to unravel their biological functions. To achieve this goal, we report an integrative modeling approach to simultaneously determine structure and dynamics of macromolecular systems from cryo-electron microscopy density maps. By quantifying the level of noise in the data and dealing with their ensemble-averaged nature, this approach enables the integration of multiple sources of information to model ensembles of structures and infer their populations. We illustrate the method by characterizing structure and dynamics of the integral membrane receptor STRA6, thus providing insights into the mechanisms by which it interacts with retinol binding protein and translocates retinol across the membrane.

## INTRODUCTION

Cryo-electron microscopy (cryo-EM) (1–9) is a powerful structural biology technique that enables the characterization of complex biological systems that are not readily amenable to other traditional techniques, such as x-ray crystallography and NMR spectroscopy. With the continuous progress in the development of both instrumentation and image processing software, cryo-EM is rapidly approaching the resolution of x-ray crystallography (2–9), allowing the structures of complexes or individual proteins of great biological relevance to be determined in their natural environments at nearly atomistic resolution (10–17).

Despite these great advances, a major challenge remains open—the characterization of the dynamics of the systems observed (18,19). This is a crucial problem, because most macromolecular machines populate multiple conformational states, and their functions depend on the interplay between structure and dynamics. In several cases, cryo-EM can detect alternative conformations (3–6,15,16), provided that two-dimensional images of particles with distinct conformations are separately classified (5,6,20). However, if the system has highly dynamic regions or the low resolution of two-dimensional images hinders classification, three-dimensional reconstructions generated by combining multi-

ple class-averages present regions at lower resolution. These regions may correspond to flexible parts of the system, which are averaged out in the class-averaging and reconstruction process, or to particularly noisy portions of the map caused, for example, by radiation damage.

Several modeling approaches are currently used to translate cryo-EM data into structural models (21,22). Following the classification proposed in (22), these approaches include methods for rigid-body fitting (Chimera (23), COAN (24), EMfit (25), MODELLER (26), MultiFit (27), SITUS (28)), flexible fitting (EMFF (29), MDFF (30), MODELLER (26), SITUS (28), MDFIT (31), Flex-EM (32)), homology modeling (Fold-EM (33), ROSETTA (34), MODELLER (26)), de novo modeling (EM-fold (35), SITUS (28), IMP (36), RELION (20), Phenix (37)), and integrative approaches (IMP (36)). All these approaches search for single structural models that minimize the deviation between observed and predicted cryo-EM density maps, usually by incorporating additional restraints into Monte Carlo or molecular dynamics (MD) simulations. Some of these techniques can provide multiple alternative models that individually fit the input map to a certain extent (24,38), in the same way as multiple molecular models are derived from NMR spectroscopy data (39), and routinely deposited in the PDB database. The sets of these models can be considered as uncertainty ensembles (40), because they reflect the limited information available on the systems and thus the fact that different models might be equally consistent with the input data; they do not, however, reflect

Submitted November 17, 2017, and accepted for publication February 20, 2018.

\*Correspondence: [mb2006@cam.ac.uk](mailto:mb2006@cam.ac.uk) or [mv245@cam.ac.uk](mailto:mv245@cam.ac.uk)

Editor: Monika Fuxreiter.

<https://doi.org/10.1016/j.bpj.2018.02.028>

© 2018 Biophysical Society.

This is an open access article under the CC BY license (<http://creativecommons.org/licenses/by/4.0/>).

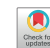

the conformational heterogeneity arising from the internal dynamics of the systems themselves (40–44). In many cases, as for instance in inferential structure determination (45), weights can be associated to the members of these uncertainty ensembles. These weights quantify the consistency with the input information and thus the overall confidence in each individual model (46); they are not, however, statistical weights, because they are not meant to represent the equilibrium populations of different conformations present in a conformationally heterogeneous mixture.

The methods described above can successfully determine single-structure models as well as uncertainty ensembles from cryo-EM data, but they do not provide fully quantitative information about the thermodynamics and dynamics of the systems studied. Such information can only be extracted from thermodynamic ensembles representing sets of confor-

mations, together with their statistical weights, which coexist in a heterogeneous mixture along with their equilibrium populations (40,44,47). To obtain a thermodynamic ensemble, one should search for structural models whose ensemble-averaged observables, rather than individual conformations, fit the input data (40,44,47). Importantly, in the construction of such thermodynamic ensembles, all possible sources of errors should be taken into account when evaluating the fit of the ensemble with the experimental data (46,48).

Here, we report an approach to enable the simultaneous determination of structure and dynamics of proteins and protein complexes by modeling thermodynamic ensembles from cryo-EM density maps. This approach is based on the recently introduced metainference (46), a general Bayesian inference method (45) that enables the modeling of heterogeneous systems from noisy, ensemble-averaged experimental data. This method incorporates a Bayesian treatment of cryo-EM data that accounts for variable levels of noise in the maps and enables structural modeling at atomistic resolution (49).

Metainference (46) is a Bayesian framework (45) for modeling thermodynamic ensembles by integrating prior information on a system (physical, chemical, or statistical knowledge) with noisy experimental data. The method is designed to deal with conformationally heterogeneous systems, in which experimental observations reflect an ensemble of states rather than a single conformation, and with data affected by known and unknown errors. The metainference approach enables: 1) optimally combining and weighting mul-

multiple sources of information, 2) modeling thermodynamic ensembles, 3) determining the population of all states in the ensemble, and 4) determining the level of noise in the input data. In doing so, metainference allows overcoming the limitations of individual computational and experimental techniques (40). Standard MD simulations, which are hampered by inaccuracies in the empirical physico-chemical description of the system (the force field), are complemented by experimental data, which alone provide only sparse information affected by random and systematic errors.

In metainference, the generation of models is guided by the metainference energy function, defined as  $E_{MI} = -k_B T \log p_{MI}$ , where  $k_B$  is the Boltzmann constant,  $T$  is the temperature of the system, and  $p_{MI}$  is the metainference posterior probability. The posterior expresses the probability of observing a given set of structural models, and possibly other parameters, in terms of prior information and data likelihood. The former encodes physico-chemical knowledge of the system; the latter quantifies the agreement with experimental data and incorporates a model of experimental noise. In the case of Gaussian noise, the metainference posterior of observing a set of  $N$  conformations  $\mathbf{X} = [X_r]$  given  $N_d$  independent experimental data points  $\mathbf{D} = [d_i]$  is

$$p_{MI}(\mathbf{X}, \sigma^{\text{SEM}}, \sigma^B | \mathbf{D}) = \prod_{r=1}^N p(X_r) \prod_{i=1}^{N_d} \frac{1}{\sqrt{2\pi} \sqrt{(\sigma_{r,i}^B)^2 + (\sigma_{r,i}^{\text{SEM}})^2}} \exp \left\{ -\frac{1}{2} \frac{[d_i - f_i(\mathbf{X})]^2}{(\sigma_{r,i}^B)^2 + (\sigma_{r,i}^{\text{SEM}})^2} \right\} p(\sigma_{r,i}^B), \quad (1)$$

where  $f_i(\mathbf{X}) = (1/N) \sum_{r=1}^N f_i(X_r)$  is the average of the predictor (or forward model)  $f_i$  for the experimental observable  $d_i$  calculated over the set of  $N$  conformations,  $\sigma_{r,i}^B$  is a parameter quantifying the noise level in data point  $d_i$ , and  $\sigma_{r,i}^{\text{SEM}}$  is the statistical error in calculating an ensemble average of  $f_i$  using a finite set of conformations. The parameters  $p(\sigma_{r,i}^B)$  and  $p(X_r)$  are the priors on  $\sigma_{r,i}^B$  and  $X_r$ , respectively.

A sample of the posterior distribution is typically obtained by running a multiple-replica simulation (50) guided by the associated metainference energy function

$$E_{MI} = E_{MD} + \frac{k_B T}{2} \sum_{r,i} \frac{[d_i - f_i(\mathbf{X})]^2}{(\sigma_{r,i}^B)^2 + (\sigma_{r,i}^{\text{SEM}})^2} + E_\sigma, \quad (2)$$

in which the force field of standard MD simulations,  $E_{MD} = -k_B T \sum_{r=1}^N \log p(X_r)$ , is modified by 1) a series of (harmonic) data restraints that ensure the agreement of the structural ensemble with the experimental data and 2) a series of error restraints,  $E_\sigma = k_B T \sum_{r,i} \{ -\log p(\sigma_{r,i}^B) + 0.5 \log [(\sigma_{r,i}^B)^2 + (\sigma_{r,i}^{\text{SEM}})^2] \}$ . In this multireplica simulation scheme, one needs to sample, for each replica, not only the space of possible conformations  $X_r$ , but also of the parameters  $\sigma_{r,i}^B$  that quantify the level of noise in the data. This is typically achieved by a Gibbs sampling scheme, which combines MD to sample the coordinates space with Monte Carlo for the noise parameters  $\sigma_{r,i}^B$ . The values of these noise parameters ultimately determine the intensities of the harmonic data restraints: low noise will result in a strong structural restraint; inconsistent data points and outliers will be automatically labeled as noisy and down-weighted in the construction of the final ensemble.

## The metainference approach for cryo-EM density maps

In the following, we define the metainference components, previously introduced in general terms, specifically for the case of cryo-EM data. The

development of these elements builds on the approach proposed in (49). A summary of all the elements at the basis of our approach is reported in Table S1. The method is implemented in the PLUMED-ISDB module (51) of the open-source, freely available PLUMED library (<http://www.plumed.org>) (52).

*Experimental data.* Typically, a cryo-EM density is distributed as a map defined on a grid, or set of voxels, in real space. In our approach, we will represent the experimental density map using a Gaussian mixture model (GMM)  $\phi_D$  with  $N_D$  components (data-GMM):

$$\phi_D(\mathbf{x}) = \sum_{i=1}^{N_D} \phi_{D,i}(\mathbf{x}) = \sum_{i=1}^{N_D} \omega_{D,i} \cdot G(\mathbf{x} | \mathbf{x}_{D,i}, \Sigma_{D,i}), \quad (3)$$

where  $\omega_{D,i}$  is the (normalized) weight of the  $i$ th component of the data GMM and  $G$  is a normalized Gaussian function centered in  $\mathbf{x}_{D,i}$  and with covariance matrix  $\Sigma_{D,i}$ . This representation has three advantages. First, it is computationally convenient to use an analytical representation of the input data, rather than a discrete definition on a grid. Second, a GMM can provide a representation of the data in terms of independent bits of information, whereas in the grid representation neighboring voxels should be considered as correlated data points affected by correlated noise. Third and finally, a GMM can be tuned to represent the data at different resolutions, from coarse-grained for initial efficient modeling or for low-resolution maps, to atomistic for refinement of high-resolution maps. To efficiently fit high-resolution maps at near-atomistic detail, we used a divide-and-conquer approach (49), which starts from a low-resolution fit using few Gaussians and refines it in subsequent iterations to increase the resolution of the final GMM (Supporting Material).

*The forward model.* We developed a forward model to simulate a cryo-EM map from a structural model. As for the representation of the experimental map, the forward model  $\phi_M$  is a GMM. Because here we employed high-resolution synthetic and real cryo-EM maps, we represented each heavy atom of the system by one Gaussian function, whose parameters were obtained by fitting the electron atomic scattering factors (53) for a given atomic species (Table S2). In the case of low-resolution maps, a single Gaussian can be used to represent each coarse-grained bead, with the Gaussian width proportional to the size of the bead (49).

*The noise model.* The deviation between predicted and observed density maps is measured in terms of the overlap  $ov_{MD,i}$  between the forward model GMM  $\phi_M$  and the  $i$ th component  $\phi_{D,i}$  of the data-GMM,

$$ov_{MD,i} = \int d\mathbf{x} \phi_M(\mathbf{x}) \phi_{D,i}(\mathbf{x}). \quad (4)$$

The overlap  $ov_{MD,i}$  can be expressed in a computationally convenient analytical form (49), with  $\phi_{D,i}(\mathbf{x})$  as a Gaussian function and  $\phi_M(\mathbf{x})$  as a GMM. In a heterogenous system, the forward model  $\phi_M$  is an average over the  $N$  metainference replicas  $\phi_M^r$ , and thus the overlap can be written as

$$\begin{aligned} \int d\mathbf{x} \left( \frac{1}{N} \sum_{r=1}^N \phi_M^r(\mathbf{x}) \right) \phi_{D,i}(\mathbf{x}) &= \frac{1}{N} \sum_{r=1}^N \int d\mathbf{x} \phi_M^r(\mathbf{x}) \phi_{D,i}(\mathbf{x}) \\ &= \frac{1}{N} \sum_{r=1}^N ov_{MD,i}^r = \overline{ov}_{MD,i}. \end{aligned} \quad (5)$$

For each component of the data-GMM, we used a Gaussian noise model with one uncertainty parameter per data point to account for a variable level of noise across the map. The data likelihood for the overlap  $ov_{DD,i}$  of the  $i$ th component of the data-GMM with the entire data-GMM can then be written as

$$\begin{aligned} p\left(ov_{DD,i} | \mathbf{X}, \sigma_{r,i}^{\text{SEM}}, \sigma_{r,i}^B\right) &= \frac{1}{\sqrt{2\pi} \sqrt{\left(\sigma_{r,i}^B\right)^2 + \left(\sigma_{r,i}^{\text{SEM}}\right)^2}} \\ &\times \exp\left[-\frac{1}{2} \frac{\left(ov_{DD,i} - \overline{ov}_{MD,i}\right)^2}{\left(\sigma_{r,i}^B\right)^2 + \left(\sigma_{r,i}^{\text{SEM}}\right)^2}\right]. \end{aligned} \quad (6)$$

*Prior information.* As structural prior information  $p(X_r)$ , we used the AMBER99SB\*-ILDN molecular mechanics force field (54) and the GBSA implicit model of water (55). For the uncertainty parameters, we used an uninformative Jeffreys prior (56). To avoid sampling all the uncertainty parameters, we marginalized them before simulating the system (Supporting Material). The level of noise in each component of the data GMM can then be estimated a posteriori using all the structural models produced by the metainference simulations (Supporting Material).

*Metainference energy function.* After defining the noise model as outlined in the previous paragraphs and marginalizing all the noise parameters, the metainference energy function for cryo-EM data becomes:

$$\begin{aligned} E_{\text{MI}} = E_{\text{MD}} - k_B T \sum_{r,i} \log &\left[ \frac{1}{2\left(ov_{DD,i} - \overline{ov}_{MD,i}\right)} \right. \\ &\left. \times \operatorname{erf}\left(\frac{ov_{DD,i} - \overline{ov}_{MD,i}}{\sqrt{2} \sigma_{r,i}^{\text{SEM}}}\right) \right], \end{aligned} \quad (7)$$

where  $\operatorname{erf}(x)$  is the error function.

## General details of the metainference simulations

All simulations were performed using as prior the AMBER99SB\*-ILDN force field (54) along with the GBSA implicit model of water (55). This is a computationally convenient combination of force fields, although its accuracy has been shown to be modestly inferior compared to AMBER99SB\*-ILDN combined with explicit solvent models (57). Starting models were equilibrated at 300 K for 1 ns. A time step of 2 fs was used together with LINCS constraints (58). The van der Waals and Coulomb interactions were cut off at 2.0 nm. Neighbor lists for all long-range interactions were cut off at 2.0 nm and updated every 10 MD steps. Simulations were carried out using a nonperiodic cell in the canonical ensemble at 300 K, enforced by the Bussi-Donadio-Parinello thermostat (59). Configurations were saved every 2 ps for post-processing. To improve computational efficiency, the cryo-EM restraint was calculated every 2 MD steps (60), using neighbor lists to compute the overlaps between model and data GMMs, with cutoff equal to 0.01 and update frequency of 100 steps. Well-tempered metadynamics (61) was used to accelerate sampling of the metainference ensemble (Supporting Material). All simulations were carried out with GROMACS 4.5.7 (62) and PLUMED (52). Parameters of the GBSA implicit solvent were imported from GROMACS 5.1.4.

## GroEL metainference simulations

The crystal structures of apo GroEL (PDB: 1XCK) (63) and GroEL-ADP complex in the relaxed allosteric state (PDB: 4KI8) (64) were used to generate a synthetic cryo-EM map, using the following procedure. Chains A were extracted from the two PDBs (Fig. 1 A) and aligned using UCSF Chimera (23). MODELLER v9.17 (26) was used to generate a

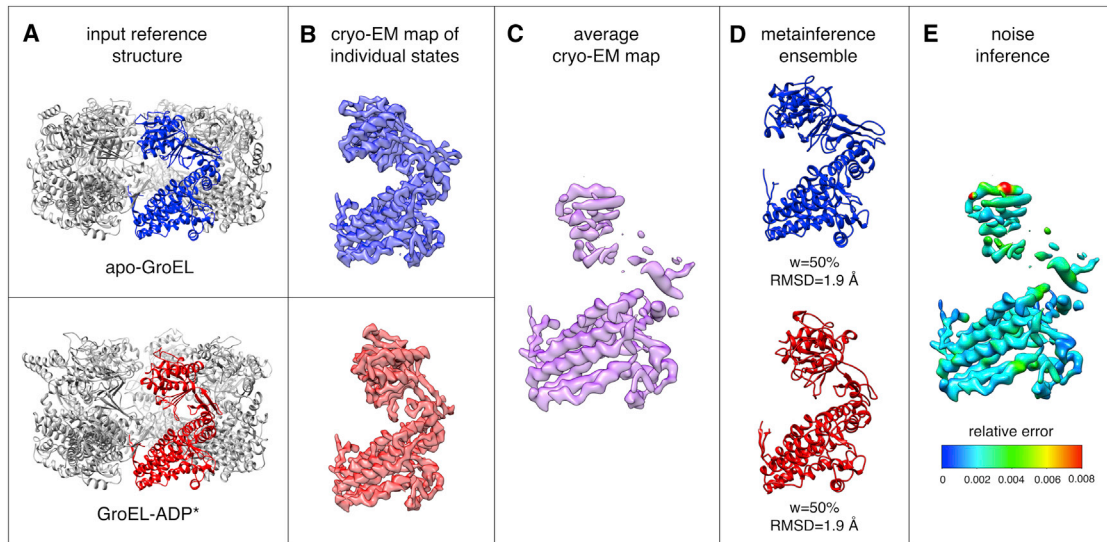

FIGURE 1 Validation of the meta-inference approach on a conformationally heterogeneous ensemble of the chaperonin GroEL. The crystal structure of Apo-GroEL (63) (A, blue) and a comparative model built from the structure of GroEL in complex with ADP (64) (A, red) were used to create synthetic cryo-EM maps at near-atomic resolution (B). An average map was then computed by mixing contributions from the two models in ratio 1:1 (C). The meta-inference approach was capable of disentangling the contribution of the two states (D), determining their relative populations in the mixture, and inferring the local level of noise in the map (E). To see this figure in color, go online.

comparative model (GroEL-ADP\*) of the sequence of apo GroEL based on the GroEL-ADP complex template (64). The gmconvert utility (65) was then used to separately convert the apo-GroEL and GroEL-ADP\* atomistic models into two density maps (Fig. 1 B). Radius and weight for the conversion were determined by the residue-type method implemented in gmconvert. The final synthetic map was computed as the average of the two individual maps, with equal weight (Fig. 1 C). A divide-and-conquer approach (49) was used to fit a GMM with 4000 components, which resulted in a cross correlation with the original map of  $>0.99$  (Fig. S1). Initial models for the meta-inference production run were randomly extracted from the 1-ns-long equilibration run initiated from the apo-GroEL model. The meta-inference ensemble was simulated using four replicas for a total aggregated time of 50 ns.  $\sigma_{r,i}^{\text{SEM}}$  was kept constant for all replicas and set to  $0.01 \cdot \text{ov}_{DD,i}$ . This parameter determines the maximum intensity of the cryo-EM restraint in the case of the absence of data noise ( $\sigma_{r,i}^{\text{B}} = 0$ ) and was set to the minimum value that allowed a proper integration of the cryo-EM restraint. To enhance sampling, we used well-tempered metadynamics with  $W_0 = 1000$  kJoule/mol and  $\gamma = 150,000$ .

### STRA6 meta-inference simulations

The cryo-EM map of the complex of zebrafish STRA6 with copurified calmodulin at 3.9 Å resolution (EMD: 8315 (66)) was fit with a GMM using a divide-and-conquer approach (49). The final GMM was composed of 11,585 Gaussians and resulted in a cross correlation with the original map equal to 0.97 (Fig. S2). The cytosolic loop (residues 575–597) missing from the deposited model (PDB: 5SY1) was modeled using the software MODELLER v9.17. The residue numbering scheme was kept as in the deposited model. The resulting comparative model was then equilibrated at 300 K, as previously described. Initial models for two independent production runs (labeled as “RUN I” and “RUN II”) were then randomly extracted from the equilibration run. The meta-inference ensemble was simulated using 16 replicas for a total aggregated time of 355 ns per production run.  $\sigma_{r,i}^{\text{SEM}}$  was set to  $0.1 \cdot \text{ov}_{DD,i}$ . To enhance sampling, we used well-tempered metadynamics with  $W_0 = 5000$  kJoule/mol and  $\gamma = 950,000$ . Details of the analysis of the simulations (stereochemistry assessment,

comparison with the experimental cryo-EM map, free-energy calculations, noise inference, and convergence analysis) are reported in the next sections.

### Stereochemistry assessment of the STRA6 ensemble

To measure the stereochemical quality of the ensemble of STRA6 models generated by the meta-inference method, we calculated the distribution of the backbone dihedral angles  $\phi$  and  $\psi$  on the conformations sampled in the two independent simulations. To achieve this, we used the program PROCHECK (67), specifically the procheck\_nmr collection of codes designed to evaluate the quality of NMR ensembles. This program classifies all residues in all models in four regions of the Ramachandran plot (Fig. S3 A): residues in most favored regions (red), in additional allowed regions (yellow), in generously allowed regions (light yellow), and in disallowed regions (white). The percentages of residues in each of these regions for the two independent meta-inference simulations were, in both cases: 87.4, 11.6, 0.5, and 0.5% (Fig. S3 C). These values were comparable to those obtained using the STRA6 deposited model (PDB: 5SY1): 86.4, 13.3, 0.3, and 0.0% (Fig. S3 B).

### Comparison with the STRA6 experimental cryo-EM map

To evaluate the quality of the fit of our meta-inference ensemble with the experimental map and compare it with the deposited model, we used the gmconvert utility (65) to calculate synthetic cryo-EM maps from structural models. It is important to note that the algorithm implemented in gmconvert is different from our forward model and from the approach implemented in RELION (20) and used in (66) to refine the deposited model. In this way, gmconvert provides a method to predict a cryo-EM map independent from those used in the generation of our ensemble and in the refinement of the deposited model. We believe that this is a fair procedure to evaluate the agreement with the experimental map. The local cross correlation (CC) with the experimental map (EMD: 8315) of the average map computed on our meta-inference ensemble and the one computed on the deposited model



was evaluated in a five-voxel sliding window using the “vop” local correlation command in UCSF Chimera (23). The same program was then used to color the metainference maps and deposited-model maps based on the value of the local CC (Figs. 2, B and D and S4, B and D).

### STRA6 thermodynamic ensemble analysis

To characterize the thermodynamics of the metainference ensemble obtained from the STRA6 cryo-EM data, we projected all the conformations onto a set of structural descriptors, or collective variables (CVs). To shed light on the dynamics of the external cleft and the binding of RBP, the CVs were defined as: 1) the distance between the C $\alpha$  atoms of residues L323 and N441 in the first chain of STRA6 and 2) the distance between the C $\alpha$  atoms of the corresponding residues in the other identical chain (L323' and N441'). To investigate the role of the juxtamembrane (JM) helix in retinol binding and release, the CVs were defined as: 1) the distance between the geometric centers of residues P248-D252 in JM and V535'-F538' in the JM loop (JML) and 2) the distance between the geometric centers of residues P248-D252 in JM and L366-R376 in TM7. The PLUMED driver utility (52) was used to calculate the CVs defined above from the metainference ensemble, which were then used to construct the associated free energies (Figs. 3 B and 4 C).

### Convergence of the STRA6 metainference simulations

To assess convergence, we performed a cluster analysis of the two independent STRA6 simulations. We first merged the two runs (labeled as “RUN I” and “RUN II”) and then performed a cluster analysis on the concatenated trajectory, after discarding the initial 20% of each run. We used the GROMOS clustering algorithm (68) and the backbone root-mean-square deviation (RMSD) as measure of conformational similarity, with a cutoff equal to 0.35 nm. In this way, we defined a discrete set of 18 conformational states of STRA6 common to the two production simulations. To assess the convergence of a given run, for each cluster we calculated its population and error as the average and standard deviation of the population computed in the first- and second-half of each simulation, and then we compared the results from the two independent runs (Fig. S10). Additional characterization of the STRA6 ensemble obtained from RUN I and RUN II is reported in Figs. S4, S7, and S8.

## RESULTS AND DISCUSSION

### Validation with GroEL data

We first assessed the accuracy of the metainference approach by applying it to the case of the chaperonin GroEL in two different conformations (Fig. 1 A): apo-GroEL, the compact crystal structure of apo GroEL (63), and GroEL-ADP\*, a comparative model built from an extended allosteric state adopted by GroEL in complex with ADP (64). We created synthetic cryo-EM maps from these two models (Fig. 1 B), and used them to construct an average cryo-EM map that equally mixed contributions from the two states (Fig. 1 C), which have a backbone RMSD of 3.9 Å (Fig. S5). As expected, the metainference ensemble was characterized by the presence of two distinct, equally populated structural clusters (Fig. 1 D), which corresponded to apo-GroEL and GroEL-ADP\*, with backbone RMSD of the centers of the two clusters from the correspondent model equal to 2.0 Å (Fig. S5). Our approach accounts for unknown and variable levels of noise across the experimental map during the modeling of the ensemble. In this case, the only source of error, i.e., of deviation between predicted and observed maps, is the difference between the procedures used to generate the synthetic map and in our modeling approach. The inferred level of relative noise was fairly uniform across the map, with an average value of  $\sim 0.003$  (Figs. 1 E and S6).

### Structure and dynamics of the STRA6 membrane receptor

We then applied our metainference approach to the integral membrane receptor STRA6 (66), which mediates the cellular uptake of retinol by extracting it from its carrier

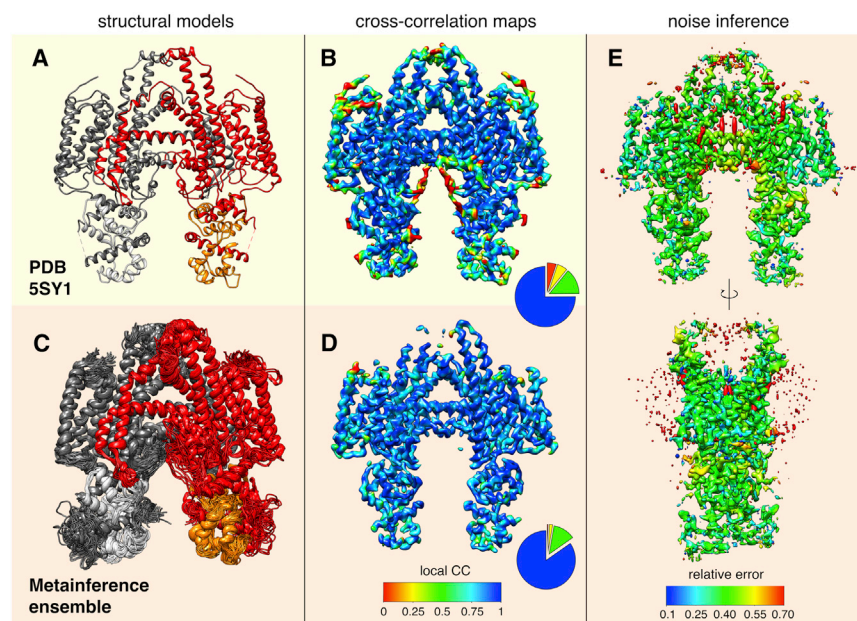

FIGURE 2 Structure, dynamics, and noise characterization of the STRA6 membrane complex. Compared to the single-structure model (PDB: 5SY1, A), the metainference ensemble displays a higher degree of flexibility (C). We calculated the predicted cryo-EM maps from the single-structure model (B) and metainference ensemble (D) and evaluated the global and local CC with the experimental map. The metainference map provides a better CC with the experimental map (global CC = 0.91) compared to the single-structure map (global CC = 0.86), especially in the more dynamical regions of STRA6. Cross-correlation maps are visualized at a threshold of 3.5. The pie charts report the distributions of local CC in the regions of the single-structure and metainference maps with density between 3.4 and 3.6. The level of relative error in the experimental map inferred by metainference is rather uniform, with the exception of the regions occupied by cholesterol and amphipols (E). To see this figure in color, go online.

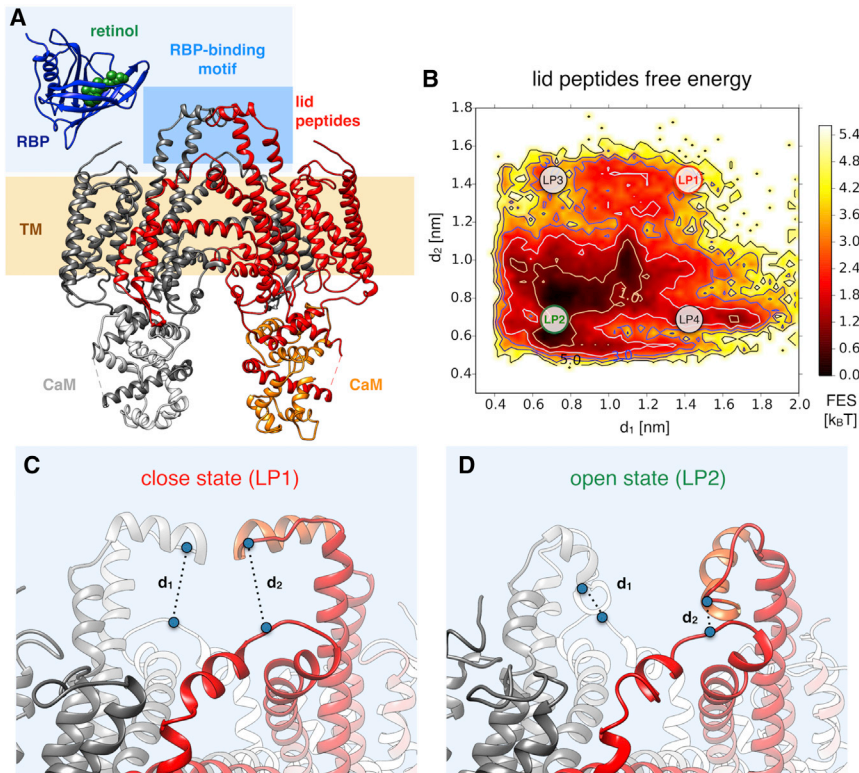

**FIGURE 3** Structural insights into the mechanism of RBP binding. To understand the mechanism of RBP binding (*A*), we projected all conformations of the metainference ensemble along the two collective variables  $d_1$  and  $d_2$ , which were defined as the distances between residues N441 in the TM8-TM9 loop and L323 in LP, in each of the two identical monomers. The resulting free energy landscape indicates an equilibrium among different conformations (*B*). The close state observed in the single-structure model (LP1, *C*), in which the two LPs are close together, has a relatively low population. A more stable state is an open conformation in which the two LPs fold back to interact with the TM8-TM9 loop (LP2, *D*). States in which only one of the two LPs folds back are also visible (LP3 and LP4, *B*). To see this figure in color, go online.

(retinol binding protein, or RBP) and moving it across the membrane (69). Recently, zebrafish STRA6 was determined at 3.9 Å resolution by single-particle cryo-EM (EMD: 8315) (66). The structural model obtained from the cryo-EM map (PDB: 5SY1) revealed a dimer of STRA6 in complex with the protein calmodulin, and enabled the characterization of the regions involved in RBP binding and retinol translocation across the membrane (66). In this work we focus in particular on the regions of the STRA6 map that were determined at lower resolution (66), including the periphery of the complex and the RBP binding region, to show that they can be interpreted in terms of a combination of conformational dynamics and noise in the data.

#### The STRA6 metainference ensemble

Starting from the 5SY1 structure (Fig. 2 *A*), we modeled a thermodynamic ensemble of conformations by integrating cryo-EM data (Fig. S2) with an a priori, physico-chemical knowledge of the system (Materials and Methods). In the generated ensemble (Figs. 2 *C* and S4 *C*), STRA6 presents a significant degree of flexibility around the single-structure model, in particular in the N-terminal and C-terminal domains, the lid peptide (LP) and the RBP-binding motif, the cytosolic loop, and the JM helix (Fig. S7 *A*). These regions correspond to areas at lower resolution in the experimental map (66), as well as in the back-calculated maps (Figs. 2, *B* and *D* and S4, *B* and *D*). The cytosolic loop, which is not included in the PDB: 5SY1 structure, displays

the largest fluctuations (Fig. S7 *A*, *magenta*), whereas calmodulin (Fig. S7 *B*) and the STRA6 trans-membrane (TM) domain (Fig. S7 *A*, *gray*) are instead more rigid and deviate less from the PDB: 5SY1 model (Fig. S7, *C* and *D*). The latter result is particularly relevant, given the low accuracy of the prior in the TM region (Materials and Methods).

We then measured the agreement of the metainference ensemble with the experimental data by calculating the maps predicted from the ensemble and the single-structure model (Supporting Material). We found that the metainference ensemble provided a better cross correlation with the experimental map (global CC = 0.91) than the single-structure model (global CC = 0.86), especially in the more dynamical regions of STRA6 (Figs. 2, *B* and *D* and S4, *B* and *D*). We also verified that the improved agreement with the experimental data was not achieved at the expense of the stereochemical quality of the models (Fig. S3).

#### Noise inference

To quantify the level of noise in the data, we calculated an error density map from the metainference ensemble (Supporting Material) and visualized it onto the experimental map (Figs. 2 *E* and S4 *E*). The inferred level of relative error was fairly uniform, with an average value of  $\sim 0.38$  (Fig. S8), except for a few specific regions: the binding sites in-between the two horizontal intramembrane helices (IM), the interior of the outer cleft, and the external region



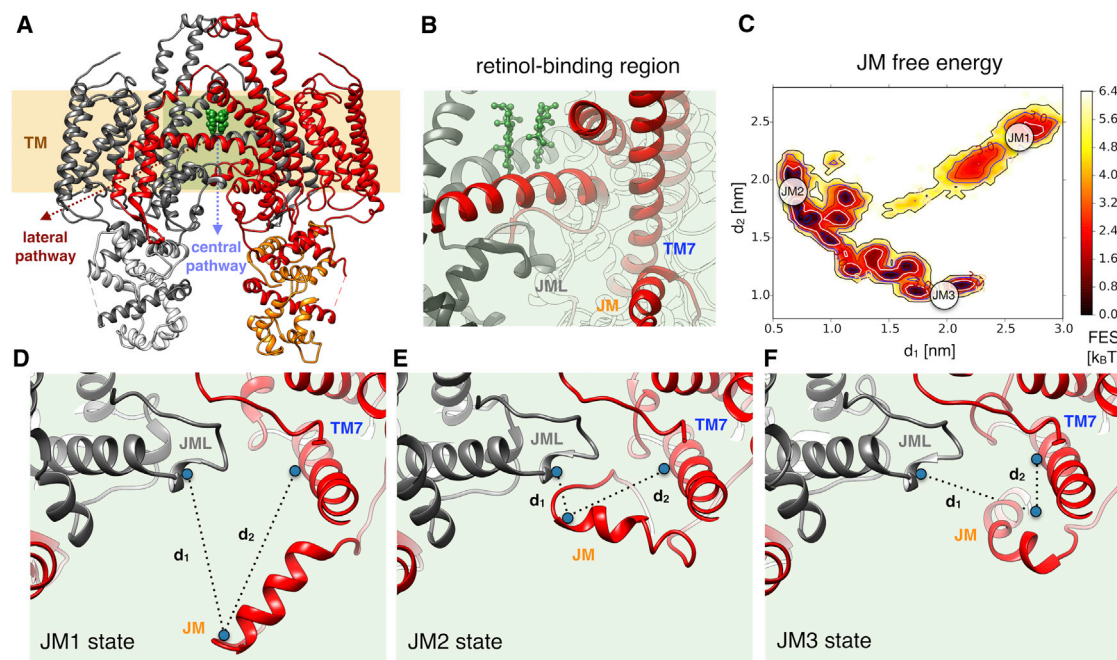

FIGURE 4 Structural insights into the mechanism of retinol release. To investigate the role of JM in retinol binding and release (A and B), two collective variables were defined as the distance between the geometric centers of residues P248-D252 in JM and V535'-F538' in JML ( $d_1$ ) and the distance between the geometric centers of residues P248-D252 in JM and L366-R376 in TM7 ( $d_2$ ). The associated free energy landscape indicated an equilibrium among different conformations (C). JM, which in the PDB model resides far apart from JML and TM7 (JM1, D), can transiently interact with both JML (JM2, E) and TM7 (JM3, F), suggesting a possible role of JM in facilitating retinol release by weakening the JML-IM interaction and the stability of the binding site situated between the IM helices (B). To see this figure in color, go online.

surrounding the TM domain (Figs. 2 E and S4 E). It has been suggested (66) that all these regions are occupied by components that were not explicitly modeled, including cholesterol in the binding sites and in the outer cleft, and amphipols in the shell around the TM domain. Consistent with the conclusion that these electron densities could not be explained by the presence of STRA6 alone, the metainference method resulted in the assignment of a high level of noise to these regions.

#### Dynamics in the RBP-binding region

Next, we investigated how the conformational dynamics obtained by the metainference approach can be linked to the biological function of STRA6 and thus to what extent the resulting ensemble can be more informative and predictive than a single-structure model. The observed flexibility in the N-terminal domain might be functional, as this region might act as a sensor for unidentified ligands (66) or to facilitate RBP recognition and recruiting through nonspecific interactions, before binding specifically. We found that the LP region (Fig. 3 A) is characterized by the presence of an equilibrium among different conformations (Fig. 3 B). The state in which the two LPs from the two STRA6 monomers are close together (LP1, Fig. 3 C), as in the PDB model, appear to have a relatively low population. In the most populated state, the two LPs fold back and approach the loop region between TM8 and TM9 (LP2, Fig. 3 D). States in which

only one of the two LPs folds back were also present (LP3 and LP4, Fig. 3 B). As these results are consistent with the possibility that LP2, rather than LP1, may be more productive for RBP binding, incorporating further information about the physico-chemical environment in the surroundings of the LP region will improve their prior description and offer a more accurate quantification of their relative stabilities. The existence of the LP2 state, not directly visible in the single-structure model, could explain the fact that inserting a Myc tag at the apex of the TM8-TM9 loop impairs RBP binding (70). This effect would be the result of altering the equilibrium among LP states in favor of either a conformation not productive for binding or one destabilizing the actual binding state, depending upon whether LP2 is the actual binding conformation.

#### Translocation of retinol across the membrane

Concerning the exit mechanism of retinol from STRA6 into the cytosol (Fig. 4, A and B), the single-structure model suggests a lateral pathway, as the alternative pathway from the central dimer interface would require significant conformational changes (66). From our study of the conformational dynamics of STRA6, we identify a potential role of the JM helix in regulating retinol release through either of the two pathways. This fragment populates multiple distinct conformations in our ensemble (Fig. 4 C). In one state (JM1, Fig. 4 D), JM points outwards from STRA6, as in

the single-structure model. In the second (JM2, Fig. 4 E), this peptide interacts with the JML, which is situated below the horizontal IM helices and the putative retinol binding site (Fig. 4 B). In another state (JM3, Fig. 4 F), JM resides in proximity to TM7. This complex equilibrium among states suggests that JM can transiently interact with JML and possibly compete with the formation of the conserved salt bridge D539-R511' between JML and IM. This salt bridge appears to be crucial for consolidating the JML-IM interaction and stabilizing the retinol binding site located in-between the IM helices, as its disruption by mutation in human STRA6 results in Matthew-Wood syndrome (71). By competing with the salt-bridge formation, JM could promote IM and JML mobility, weaken the stability of the retinol binding site, and eventually favor retinol unbinding. Translocation of retinol across the membrane can later occur through either the lateral or central pathways. The latter scenario would require additional conformational changes, which might be facilitated by the transient disruption of the salt bridge and the increased mobility of this region.

This dynamical picture of JM offers interesting perspectives, regardless of the specific retinol exit pathway. It could rationalize why mutations in TM6 and TM7 inhibit retinol uptake (72), as they could shift the equilibrium toward a state (JM3) in which JM is close to TM7 and cannot destabilize the IM-JML interaction to favor retinol unbinding. Furthermore, JM is adjacent in sequence to CamBPO (66), one of the STRA6 helices that directly interact with calmodulin, suggesting a possible role of calmodulin in altering the equilibrium among JM states, and ultimately regulating retinol uptake. This observation is particularly intriguing, as the role of calmodulin still remains enigmatic, with no direct link to retinol transport being identified so far.

## CONCLUSIONS

We have reported a method to determine structure and dynamics of macromolecular systems by modeling thermodynamic ensembles from cryo-EM density maps. The application to the integral membrane receptor STRA6 has illustrated how functional dynamics might remain hidden in areas of the map at lower resolution. The method is capable of revealing such dynamics by disentangling the effect of noise in the maps from conformational heterogeneity. This method is implemented in the PLUMED-ISDB module (51) of the open-source PLUMED library (<http://www.plumed.org>) (52), allowing the integration of cryo-EM with other ensemble-averaged experimental data, thus readily enabling integrative structural and dynamical biology studies (18,19). The approach can be extended to model multiple ensembles using three-dimensional reconstructions obtained from different two-dimensional class-averages and to thoroughly characterize the conformational landscape, dynamics, and function of complex biological systems.

## SUPPORTING MATERIAL

Supporting Materials and Methods, ten figures, and two tables are available at [http://www.biophysj.org/biophysj/supplemental/S0006-3495\(18\)30288-1](http://www.biophysj.org/biophysj/supplemental/S0006-3495(18)30288-1).

## AUTHOR CONTRIBUTIONS

M.B. and R.P. performed research. All authors contributed to developing the methodology, analyzing the data, and writing the manuscript.

## ACKNOWLEDGMENTS

The metainference simulations were performed on the Sisu supercomputer managed by the CSC - IT Center for Science (Finland) under the DECI-14 project "EMMI."

## REFERENCES

- Henderson, R. 1995. The potential and limitations of neutrons, electrons and x-rays for atomic resolution microscopy of unstained biological molecules. *Q. Rev. Biophys.* 28:171–193.
- Kühlbrandt, W. 2014. Biochemistry. The resolution revolution. *Science*. 343:1443–1444.
- Bai, X. C., G. McMullan, and S. H. Scheres. 2015. How cryo-EM is revolutionizing structural biology. *Trends Biochem. Sci.* 40:49–57.
- Callaway, E. 2015. The revolution will not be crystallized: a new method sweeps through structural biology. *Nature*. 525:172–174.
- Nogales, E. 2016. The development of cryo-EM into a mainstream structural biology technique. *Nat. Methods*. 13:24–27.
- Glaeser, R. M. 2016. How good can cryo-EM become? *Nat. Methods*. 13:28–32.
- Brilot, A. F., J. Z. Chen, ..., N. Grigorieff. 2012. Beam-induced motion of vitrified specimen on holey carbon film. *J. Struct. Biol.* 177:630–637.
- Carroni, M., and H. R. Saibil. 2016. Cryo electron microscopy to determine the structure of macromolecular complexes. *Methods*. 95:78–85.
- Li, X., P. Mooney, ..., Y. Cheng. 2013. Electron counting and beam-induced motion correction enable near-atomic-resolution single-particle cryo-EM. *Nat. Methods*. 10:584–590.
- Liao, M., E. Cao, ..., Y. Cheng. 2013. Structure of the TRPV1 ion channel determined by electron cryo-microscopy. *Nature*. 504:107–112.
- Bai, X. C., C. Yan, ..., Y. Shi. 2015. An atomic structure of human  $\gamma$ -secretase. *Nature*. 525:212–217.
- Campbell, M. G., D. Veisler, ..., B. Carragher. 2015. 2.8 Å resolution reconstruction of the *Thermoplasma acidophilum* 20S proteasome using cryo-electron microscopy. *eLife*. 4.
- Bartesaghi, A., A. Merk, ..., S. Subramaniam. 2015. 2.2 Å resolution cryo-EM structure of  $\beta$ -galactosidase in complex with a cell-permeant inhibitor. *Science*. 348:1147–1151.
- Fernández, I. S., X. C. Bai, ..., S. H. W. Scheres. 2013. Molecular architecture of a eukaryotic translational initiation complex. *Science*. 342:1240585.
- Zhao, J., S. Benlekber, and J. L. Rubinstein. 2015. Electron cryomicroscopy observation of rotational states in a eukaryotic V-ATPase. *Nature*. 521:241–245.
- Cianfrocco, M. A., G. A. Kassavetis, ..., E. Nogales. 2013. Human TFIID binds to core promoter DNA in a reorganized structural state. *Cell*. 152:120–131.
- Fitzpatrick, A. W. P., B. Falcon, ..., S. H. W. Scheres. 2017. Cryo-EM structures of tau filaments from Alzheimer's disease. *Nature*. 547:185–190.



18. Ward, A. B., A. Sali, and I. A. Wilson. 2013. Biochemistry. Integrative structural biology. *Science*. 339:913–915.
19. van den Bedem, H., and J. S. Fraser. 2015. Integrative, dynamic structural biology at atomic resolution—it's about time. *Nat. Methods*. 12:307–318.
20. Scheres, S. H. 2012. RELION: implementation of a Bayesian approach to cryo-EM structure determination. *J. Struct. Biol.* 180:519–530.
21. Schröder, G. F. 2015. Hybrid methods for macromolecular structure determination: experiment with expectations. *Curr. Opin. Struct. Biol.* 31:20–27.
22. Lopez-Blanco, J. R., and P. Chacon. 2015. Structural modeling from electron microscopy data. *WIREs Comput. Mol. Sci.* 5:62–81.
23. Pettersen, E. F., T. D. Goddard, ..., T. E. Ferrin. 2004. UCSF Chimera—a visualization system for exploratory research and analysis. *J. Comput. Chem.* 25:1605–1612.
24. Volkman, N., and D. Hanein. 1999. Quantitative fitting of atomic models into observed densities derived by electron microscopy. *J. Struct. Biol.* 125:176–184.
25. Rossmann, M. G., R. Bernal, and S. V. Pletnev. 2001. Combining electron microscopy with x-ray crystallographic structures. *J. Struct. Biol.* 136:190–200.
26. Sali, A., and T. L. Blundell. 1993. Comparative protein modelling by satisfaction of spatial restraints. *J. Mol. Biol.* 234:779–815.
27. Lasker, K., M. Topf, ..., H. J. Wolfson. 2009. Inferential optimization for simultaneous fitting of multiple components into a CryoEM map of their assembly. *J. Mol. Biol.* 388:180–194.
28. Wriggers, W. 2012. Conventions and workflows for using SITUS. *Acta Crystallogr. D Biol. Crystallogr.* 68:344–351.
29. Zheng, W. 2011. Accurate flexible fitting of high-resolution protein structures into cryo-electron microscopy maps using coarse-grained pseudo-energy minimization. *Biophys. J.* 100:478–488.
30. Trabuco, L. G., E. Villa, ..., K. Schulten. 2008. Flexible fitting of atomic structures into electron microscopy maps using molecular dynamics. *Structure*. 16:673–683.
31. Ratje, A. H., J. Loecker, ..., C. M. Spahn. 2010. Head swivel on the ribosome facilitates translocation by means of intra-subunit tRNA hybrid sites. *Nature*. 468:713–716.
32. Topf, M., K. Lasker, ..., A. Sali. 2008. Protein structure fitting and refinement guided by cryo-EM density. *Structure*. 16:295–307.
33. Saha, M., and M. C. Morais. 2012. FOLD-EM: automated fold recognition in medium- and low-resolution (4–15 Å) electron density maps. *Bioinformatics*. 28:3265–3273.
34. DiMaio, F., M. D. Tyka, ..., D. Baker. 2009. Refinement of protein structures into low-resolution density maps using ROSETTA. *J. Mol. Biol.* 392:181–190.
35. Lindert, S., N. Alexander, ..., J. Meiler. 2012. EM-fold: de novo atomic-detail protein structure determination from medium-resolution density maps. *Structure*. 20:464–478.
36. Russel, D., K. Lasker, ..., A. Sali. 2012. Putting the pieces together: integrative modeling platform software for structure determination of macromolecular assemblies. *PLoS Biol.* 10:e1001244.
37. Adams, P. D., P. V. Afonine, ..., P. H. Zwart. 2011. The Phenix software for automated determination of macromolecular structures. *Methods*. 55:94–106.
38. Singharoy, A., I. Teo, ..., K. Schulten. 2016. Molecular dynamics-based refinement and validation for sub-5 Å cryo-electron microscopy maps. *eLife*. 5:e16105.
39. Brünger, A. T., P. D. Adams, ..., G. L. Warren. 1998. Crystallography & NMR system: a new software suite for macromolecular structure determination. *Acta Crystallogr. D Biol. Crystallogr.* 54:905–921.
40. Bonomi, M., G. T. Heller, ..., M. Vendruscolo. 2017. Principles of protein structural ensemble determination. *Curr. Opin. Struct. Biol.* 42:106–116.
41. Sormanni, P., D. Piovesan, ..., M. Vendruscolo. 2017. Simultaneous quantification of protein order and disorder. *Nat. Chem. Biol.* 13:339–342.
42. Allison, J. R. 2017. Using simulation to interpret experimental data in terms of protein conformational ensembles. *Curr. Opin. Struct. Biol.* 43:79–87.
43. Fisher, C. K., and C. M. Stultz. 2011. Constructing ensembles for intrinsically disordered proteins. *Curr. Opin. Struct. Biol.* 21:426–431.
44. Gaalswyk, K., M. I. Muniyat, and J. MacCallum. 2017. The emerging role of physical modeling in the future of structure determination. *bioRxiv*. <https://doi.org/10.1101/228247>.
45. Rieping, W., M. Habeck, and M. Nilges. 2005. Inferential structure determination. *Science*. 309:303–306.
46. Bonomi, M., C. Camilloni, ..., M. Vendruscolo. 2016. Metainference: a Bayesian inference method for heterogeneous systems. *Sci. Adv.* 2:e1501177.
47. Lindorff-Larsen, K., R. B. Best, ..., M. Vendruscolo. 2005. Simultaneous determination of protein structure and dynamics. *Nature*. 433:128–132.
48. Schneidman-Duhovny, D., R. Pellarin, and A. Sali. 2014. Uncertainty in integrative structural modeling. *Curr. Opin. Struct. Biol.* 28:96–104.
49. Hanot, S., M. Bonomi, ..., R. Pellarin. 2017. Bayesian multi-scale modeling of macromolecular structures based on cryo-electron microscopy density maps. *bioRxiv*. <https://doi.org/10.1101/113951>.
50. Cavalli, A., C. Camilloni, and M. Vendruscolo. 2013. Molecular dynamics simulations with replica-averaged structural restraints generate structural ensembles according to the maximum entropy principle. *J. Chem. Phys.* 138:094112.
51. Bonomi, M., and C. Camilloni. 2017. Integrative structural and dynamical biology with PLUMED-ISDB. *Bioinformatics*. 33:3999–4000.
52. Tribello, G. A., M. Bonomi, ..., G. Bussi. 2014. PLUMED 2: new feathers for an old bird. *Comput. Phys. Commun.* 185:604–613.
53. Prince, E. 2004. International Tables for Crystallography, Vol. C. Wiley, Hoboken, NJ.
54. Best, R. B., and G. Hummer. 2009. Optimized molecular dynamics force fields applied to the helix-coil transition of polypeptides. *J. Phys. Chem. B*. 113:9004–9015.
55. Still, W. C., A. Tempczyk, ..., T. Hendrickson. 1990. Semianalytical treatment of solvation for molecular mechanics and dynamics. *J. Am. Chem. Soc.* 112:6127–6129.
56. Sivia, D. S., and J. Skilling. 2006. Data Analysis: A Bayesian Tutorial. Oxford University Press, Oxford, New York.
57. Beauchamp, K. A., Y. S. Lin, ..., V. S. Pande. 2012. Are protein force fields getting better? A systematic benchmark on 524 diverse NMR measurements. *J. Chem. Theory Comput.* 8:1409–1414.
58. Hess, B. 2008. P-LINCS: a parallel linear constraint solver for molecular simulation. *J. Chem. Theory Comput.* 4:116–122.
59. Bussi, G., D. Donadio, and M. Parrinello. 2007. Canonical sampling through velocity rescaling. *J. Chem. Phys.* 126:014101.
60. Ferrarotti, M. J., S. Bottaro, ..., G. Bussi. 2015. Accurate multiple time step in biased molecular simulations. *J. Chem. Theory Comput.* 11:139–146.
61. Barducci, A., G. Bussi, and M. Parrinello. 2008. Well-tempered metadynamics: a smoothly converging and tunable free-energy method. *Phys. Rev. Lett.* 100:020603.
62. Hess, B., C. Kutzner, ..., E. Lindahl. 2008. GROMACS 4: algorithms for highly efficient, load-balanced, and scalable molecular simulation. *J. Chem. Theory Comput.* 4:435–447.
63. Bartolucci, C., D. Lamba, ..., H. Heumann. 2005. Crystal structure of wild-type chaperonin GroEL. *J. Mol. Biol.* 354:940–951.

64. Fei, X., D. Yang, ..., G. H. Lorimer. 2013. Crystal structure of a GroEL-ADP complex in the relaxed allosteric state at 2.7 Å resolution. *Proc. Natl. Acad. Sci. USA.* 110:E2958–E2966.
65. Kawabata, T. 2008. Multiple subunit fitting into a low-resolution density map of a macromolecular complex using a Gaussian mixture model. *Biophys. J.* 95:4643–4658.
66. Chen, Y., O. B. Clarke, ..., F. Mancía. 2016. Structure of the STRA6 receptor for retinol uptake. *Science.* 353:6302.
67. Laskowski, R. A., M. W. MacArthur, ..., J. M. Thornton. 1993. Procheck—a program to check the stereochemical quality of protein structures. *J. Appl. Cryst.* 26:283–291.
68. Daura, X., K. Gademann, ..., A. E. Mark. 1999. Peptide folding: when simulation meets experiment. *Angew. Chem. Int. Ed.* 38:236–240.
69. Kawaguchi, R., J. Yu, ..., H. Sun. 2007. A membrane receptor for retinol binding protein mediates cellular uptake of vitamin A. *Science.* 315:820–825.
70. Kawaguchi, R., J. Yu, ..., H. Sun. 2008. Mapping the membrane topology and extracellular ligand binding domains of the retinol binding protein receptor. *Biochemistry.* 47:5387–5395.
71. van Esch, H., A. Jansen, ..., J. P. Fryns. 2007. Encephalopathy and bilateral cataract in a boy with an interstitial deletion of Xp22 comprising the CDKL5 and NHS genes. *Am. J. Med. Genet. A.* 143:364–369.
72. Zhong, M., R. Kawaguchi, ..., H. Sun. 2013. Vitamin A transport and the transmembrane pore in the cell-surface receptor for plasma retinol binding protein. *PLoS One.* 8:e73838.

**Biophysical Journal, Volume 114**

**Supplemental Information**

**Simultaneous Determination of Protein Structure and Dynamics Using  
Cryo-Electron Microscopy**

**Massimiliano Bonomi, Riccardo Pellarin, and Michele Vendruscolo**

**Divide-and-conquer GMM fit of cryo-EM maps.** To efficiently and accurately fit a high-resolution density map  $\Psi_D$  using a GMM with a large number of Gaussians, we used the divide-and-conquer approach developed in Ref. (1). We started from a low-resolution fit of  $\Psi_D$  using a GMM with a small number of Gaussians, obtained by an Expectation Maximization algorithm (2). For each component  $\phi_{D,i}^1$  of this initial GMM, we defined a submap of the original map

$$\Psi_{D,i}^1(x) = \Psi_D(x) \cdot \frac{\phi_{D,i}^1(x)}{\sum_{j=1}^{N_D^1} \phi_{D,j}^1(x)}$$

Each submap is localized in a subregion where the component  $\phi_{D,i}^1$  is localized and the sum all submaps regenerates the original map  $\Psi_D$ . The process is repeated and each submap  $\Psi_{D,i}^1$  fit using another GMM with small number of Gaussians. At each iteration, the portion of the original map fit by a given GMM becomes smaller and smaller, so that eventually few Gaussians will be sufficient to accurately reproduce high-resolution, local details. By construction, the GMM defined by the union of all the GMMs obtained at a given iteration fits the original map. This approach can be efficiently run in parallel on a cluster until the global GMM reaches the desired accuracy, measured here in terms of cross-correlation with the original map.

For GroEL, we progressively fit the synthetic map using 20, 400, and 4000 Gaussians (**Figure S1**), until reaching a final cross-correlation of over 0.99. In the case of the STRA6 receptors, we fit the experimental map with 20, 4000, and 11585 Gaussians (**Figure S2**), with a final cross-correlation of over 0.97.



**Derivation of the forward model.** To quantify the agreement of an ensemble of models with the experimental map, we need a forward model, *i.e.* a predictor of the cryo-EM density map from a single structural model. Our forward model is a GMM  $\phi_M$  with  $N_M$  Gaussian components. Since here we employed high-resolution synthetic and real cryo-EM maps, we used one component for each heavy atom of the system:

$$\phi_M(\mathbf{x}) = \sum_{i=1}^{N_M} \phi_{M,i}(\mathbf{x}) = \sum_{i=1}^{N_M} \omega_{M,i} \cdot G(\mathbf{x} | \mathbf{x}_{M,i}, \Sigma_{M,i})$$

To derive the parameters of the Gaussian for a given atomic specie (weight and covariance matrix), we fit the tabulated electron scattering form factors (3) for the neutral atom  $i$  using a single Gaussian:  $f(s) = A_i \exp(-B_i s^2)$ .

The fitting procedure followed the protocol described in Ref. (4) to fit electron atomic scattering factors with multiple Gaussians. Naturally, the one-Gaussian approximation of the form factor is accurate up to a certain value of  $s$ . For density maps of resolution up to  $\sim 3$  Å, we estimated a maximum relative deviation between tabulated and fitted form factors equal to 1%. In Tab. S1, we report, for neutral C, N, O, and S atoms, the results of the fitting procedure, the range of validity of the one-Gaussian approximation, and the relative maximum error.

From the Gaussian fit of the form factors, we can derive the parameters of the Gaussian in real space (our forward model) by Fourier Transform

$$f(r) = A_i \left(\frac{\pi}{B_i}\right)^{3/2} \exp\left(-\frac{\pi^2}{B_i} r^2\right)$$

which leads to the following identities

$$\omega_{M,i} = A_i, \quad \sigma_i = \frac{1}{\pi} \sqrt{\frac{B_i}{2}}, \quad \Sigma_{M,i} = \begin{pmatrix} \sigma_i^2 & 0 & 0 \\ 0 & \sigma_i^2 & 0 \\ 0 & 0 & \sigma_i^2 \end{pmatrix}$$

**Enhanced sampling of the metainference ensemble.** To accelerate sampling of the metainference ensemble, we used the well-tempered metadynamics algorithm (5). We added an auxiliary variable  $\beta$  to the metainference energy function:

$$E_{MI} = E_{MD} - \frac{k_B T}{\beta} \sum_{r,i} \log \left[ \frac{1}{2(\sigma v_{DD,i} - \bar{\sigma} \bar{v}_{MD,i})} \operatorname{erf} \left( \frac{\sigma v_{DD,i} - \bar{\sigma} \bar{v}_{MD,i}}{\sqrt{2} \sigma_{r,i}^{SEM}} \right) \right]$$

with  $\beta \geq 1$ . The effect of this variable is to weaken the strength of the restraint on the experimental data and avoid the system to get trapped in local free-energy minima. This parameter was sampled using a Monte Carlo (MC) algorithm at every MD simulation step. We defined  $\beta$  on a discrete grid of  $N_\beta = 20$  bins in the range from  $\beta_{min} = 1$  to  $\beta_{max} = 1000$  and distributed it according to

$$\beta_j = \beta_{min} \cdot \exp \left[ \frac{j}{N_\beta - 1} \cdot \log \left( \frac{\beta_{max}}{\beta_{min}} \right) \right]$$

with  $0 \leq j \leq N_\beta - 1$ . For  $j = 0$ , we recovered the standard metainference score. To accelerate sampling in the  $\beta$  variable, we used a well-tempered metadynamics bias potential  $V_j$  constructed by adding at every MC step a ‘‘Gaussian’’ with height equal to (5)

$$W_0 \cdot \exp \left[ -\frac{V_j}{k_B T (\gamma - 1)} \right]$$

where  $W_0$  is the initial height and  $\gamma$  the bias factor. The values of  $W_0$  and  $\gamma$  were optimized separately for GroEL and STRA6 simulations. The effect of the bias potential is to ensure efficient diffusion in the space of the  $\beta$  index, which otherwise would be hampered by high free-energy barriers (**Figure S9**). We considered for post-processing all the conformations sampled at  $\beta = 1$ , as these correspond to the members of the actual metainference ensemble. No further reweighting of these conformations was needed, as the well-tempered metadynamics bias potential tends to become quasi-stationary in the long-time limit and thus all conformations at  $\beta = 1$  are sampled under the effect of the same bias potential.

**Noise marginalization.** We used a Gaussian model of noise with one uncertainty parameter per data point, *i.e.* per component of the data GMM:

$$p(ov_{DD,i} | \mathbf{X}, \sigma_{r,i}) = \frac{1}{\sqrt{2\pi} \sigma_{r,i}} \cdot \exp \left[ -\frac{(ov_{DD,i} - \overline{ov}_{MD,i})^2}{2 \sigma_{r,i}^2} \right]$$

where  $ov_{DD,i}$  is the overlap of the  $i$ -th component of the data GMM with the entire data GMM.

The noise parameter  $\sigma_{r,i} = \sqrt{(\sigma_{r,i}^B)^2 + (\sigma_{r,i}^{SEM})^2}$  includes all sources of errors (6): errors in the data and forward model ( $\sigma_{r,i}^B$ ) and the statistical error due to the finite size of the metainference ensemble ( $\sigma_{r,i}^{SEM}$ ). This distribution accounts for a variable level of errors across the map, for example due to higher radiation damages to the periphery of the complex. However, sampling all the uncertainty parameters  $\sigma_{r,i}$  becomes a daunting task, as high-resolution maps require GMMs with thousands of components. Therefore, we marginalized all the  $\sigma_{r,i}$  parameters by integrating the likelihood in combination with a Jeffreys prior  $p(\sigma_{r,i}) = 1/\sigma_{r,i}$ , in a range corresponding to

absence of noise in the data ( $\sigma_{r,i}^B = 0$ ) to infinite noise ( $\sigma_{r,i}^B = \infty$ ). The resulting marginal likelihood is

$$\begin{aligned} p(ov_{DD,i} | \mathbf{X}) &= \int_{\sigma_{r,i}^{SEM}}^{\infty} p(ov_{DD,i} | \mathbf{X}, \sigma_{r,i}) p(\sigma_{r,i}) d\sigma_{r,i} \\ &= \frac{1}{2(ov_{DD,i} - \overline{ov}_{MD,i})} \operatorname{erf}\left(\frac{ov_{DD,i} - \overline{ov}_{MD,i}}{\sqrt{2} \sigma_{r,i}^{SEM}}\right) \end{aligned}$$

where the error function  $\operatorname{erf}(x)$  is defined as

$$\operatorname{erf}(x) = \frac{2}{\sqrt{\pi}} \int_0^x \exp(-t^2) dt$$

The meta-inference structural ensemble resulting from sampling this marginal posterior is identical to the one that we would obtain by sampling the non-marginal version. However, upon marginalization we lose direct information about the noise level of each region of the map. In the following section, we introduce two approaches to recover *a posteriori* the local level of noise.

**Noise inference.** In principle, one can use a reweighting procedure to calculate the average value of  $\sigma_{r,i}$  for each component of the data GMM.  $p(\sigma_{r,i} | \phi_D)$  can be estimated from a sample of the meta-inference posterior  $p(\mathbf{X} | \phi_D)$  in the following way. We start by noting that

$$p(\sigma_{r,i} | \phi_D) = \int d\mathbf{X} \int d\boldsymbol{\sigma} p(\mathbf{X}, \boldsymbol{\sigma} | \phi_D)$$

where the integral in  $\boldsymbol{\sigma}$  is over all the  $\sigma_{s,j}$  with  $s \neq r$  or  $j \neq i$ . We can multiply and divide the integrand by  $p(\mathbf{X} | \phi_D)$



$$p(\sigma_{r,i}|\phi_D) = \int d\mathbf{X} \int d\boldsymbol{\sigma} \frac{p(\mathbf{X}, \boldsymbol{\sigma}|\phi_D)}{p(\mathbf{X}|\phi_D)} \cdot p(\mathbf{X}|\phi_D) = \left\langle \int d\boldsymbol{\sigma} \frac{p(\mathbf{X}, \boldsymbol{\sigma}|\phi_D)}{p(\mathbf{X}|\phi_D)} \right\rangle_{MI}$$

where the average  $\langle \cdot \rangle$  is taken over the metainference simulations. If carry out the integration in  $\boldsymbol{\sigma}$  at the numerator, we obtain

$$p(\sigma_{r,i}|\phi_D) = \left\langle \frac{p(\phi_{D,i}|\mathbf{X}, \sigma_{r,i}) \cdot p(\sigma_{r,i})}{p(\phi_{D,i}|\mathbf{X})} \right\rangle_{MI}$$

which allows to numerically estimate  $p(\sigma_{r,i}|\phi_D)$  from the average of known quantities calculated *a posteriori* over the metainference simulations. The average error is then calculated as  $\langle \sigma_{r,i} \rangle = \int \sigma_{r,i} p(\sigma_{r,i}|\phi_D) d\sigma_{r,i}$ .

Alternatively, one can infer the most probable local level of noise from the entire ensemble  $\mathbf{X}$  generated by the metainference simulations.  $\mathbf{X}$  contains all conformations generated by all replicas during the metainference run. For each component of the data GMM, the probability of having a noise level equal to  $\sigma_i$ , given the ensemble and the data is:

$$p(\sigma_i|\mathbf{X}, \phi_{D,i}) = \frac{p(\mathbf{X}, \sigma_i|\phi_{D,i})}{p(\mathbf{X}|\phi_{D,i})} \propto p(\phi_{D,i}|\mathbf{X}, \sigma_i) \cdot p(\sigma_i)$$

where we omitted all terms independent from the level of noise, as these are constant in this post-processing stage. If we use the same Gaussian noise model and Jeffreys prior for  $\sigma_i$  employed in the generation of models, we obtain:

$$p(\sigma_i|\mathbf{X}, \phi_{D,i}) \propto \frac{1}{\sigma_i^2} \cdot \exp \left[ -\frac{(ov_{DD,i} - \overline{ov}_{MD,i})^2}{2 \sigma_i^2} \right]$$

where  $\overline{ov}_{MD,i}$  is the average overlap calculated over the entire metainference ensemble  $\mathbf{X}$ .

From this relation, we obtain the probability of the relative noise level  $\sigma_i^{rel} = \sigma_i/ov_{DD,i}$  from a simple change of variable:

$$p(\sigma_i^{rel} | \mathbf{X}, \phi_{D,i}) \propto \frac{1}{(\sigma_i^{rel})^2} \cdot \exp \left[ -\frac{(\sigma v_{DD,i} - \overline{\sigma v_{MD,i}})^2}{2 \sigma v_{DD,i}^2 (\sigma_i^{rel})^2} \right] = \frac{1}{(\sigma_i^{rel})^2} \cdot \exp \left[ -\frac{\Delta_i^2}{2 (\sigma_i^{rel})^2} \right]$$

$\Delta_i$  is the relative deviation of the experiment from the prediction and can be back-calculated, for each component of the data GMM, *a posteriori* from the ensemble  $\mathbf{X}$ . At this point, the most likely level of relative noise is defined as the value  $\overline{\sigma_i^{rel}}$  that maximizes  $p(\sigma_i^{rel} | \mathbf{X}, \phi_{D,i})$ :

$$\overline{\sigma_i^{rel}} = \frac{\Delta_i}{\sqrt{2}}$$

In this work, we adopted this simpler approach to calculate the error map for GroEL and STRA6 (**Figures 1E, 2E, and S4E**), following the procedure described in the next section.

**Noise map.** To visualize the relative error  $\overline{\sigma_i^{rel}}$  associated to each component of the data GMM  $\phi_D$  along with the experimental map, we first created a voxel-representation of  $\phi_D$  using the *gmconvert* utility (2). We then defined an error map  $\sigma_D$  on the same grid as  $\phi_D$

$$\sigma_D(\mathbf{x}) = \frac{\sum_{i=1}^{N_D} \overline{\sigma_i^{rel}} \cdot \phi_{D,i}(\mathbf{x})}{\sum_{i=1}^{N_D} \phi_{D,i}(\mathbf{x})}$$

and used UCSF Chimera (7) to color the voxel-representation of  $\phi_D$  using  $\sigma_D$  (**Figures 1E, 2E, and S4E**).

## Supplementary References

1. Hanot, S., M. Bonomi, C. H. Greenberg, A. Sali, M. Nilges, M. Vendruscolo, and R. Pellarin. 2017. Bayesian multi-scale modeling of macromolecular structures based on cryo-electron microscopy density maps. *bioRxiv* doi: 10.1101/113951.
2. Kawabata, T. 2008. Multiple Subunit Fitting into a Low-Resolution Density Map of a Macromolecular Complex Using a Gaussian Mixture Model. *Bioph. J.* 95:4643-4658.
3. Prince, E. 2004. *International Tables for Crystallography Vol. C*. Wiley, Hoboken.
4. Peng, L. M., G. Ren, S. L. Dudarev, and M. J. Whelan. 1996. Robust parameterization of elastic and absorptive electron atomic scattering factors. *Acta Crystallogr. A* 52:257-276.
5. Barducci, A., G. Bussi, and M. Parrinello. 2008. Well-tempered metadynamics: A smoothly converging and tunable free-energy method. *Phys. Rev. Lett.* 100.
6. Bonomi, M., C. Camilloni, A. Cavalli, and M. Vendruscolo. 2016. Metainference: A Bayesian inference method for heterogeneous systems. *Sci. Adv.* 2:e1501177.
7. Pettersen, E. F., T. D. Goddard, C. C. Huang, G. S. Couch, D. M. Greenblatt, E. C. Meng, and T. E. Ferrin. 2004. UCSF Chimera--a visualization system for exploratory research and analysis. *J. Comp. Chem.* 25:1605-1612.
8. Laskowski, R. A., M. W. Macarthur, D. S. Moss, and J. M. Thornton. 1993. Procheck - a Program to Check the Stereochemical Quality of Protein Structures. *J. Appl. Crystallogr.* 26:283-291.

## Supplementary Tables

**Table S1.** Summary of the building blocks of the metainference approach to model structure and dynamics from cryo-EM data.

| # | Name                          | Equation                                                                                                                                                                                                                                                                                                               | Notes                                                                          | PLUMED keywords        |
|---|-------------------------------|------------------------------------------------------------------------------------------------------------------------------------------------------------------------------------------------------------------------------------------------------------------------------------------------------------------------|--------------------------------------------------------------------------------|------------------------|
| 1 | normalized Gaussian function  | $G(\mathbf{x}   \bar{\mathbf{x}}, \Sigma) = \frac{1}{(2\pi)^{\frac{3}{2}}  \Sigma ^{\frac{1}{2}}} \exp \left[ -\frac{1}{2} (\mathbf{x} - \bar{\mathbf{x}})^T (\Sigma)^{-1} (\mathbf{x} - \bar{\mathbf{x}}) \right]$                                                                                                    |                                                                                |                        |
| 2 | j-th component of model-GMM   | $\phi_{M,j}(\mathbf{x}) = \omega_{M,j} \cdot G(\mathbf{x}   \mathbf{x}_{M,j}, \Sigma_{M,j})$                                                                                                                                                                                                                           | differentiable function of the model coordinates                               |                        |
| 3 | i-th component of data-GMM    | $\phi_{D,i}(\mathbf{x}) = \omega_{D,i} \cdot G(\mathbf{x}   \mathbf{x}_{D,i}, \Sigma_{D,i})$                                                                                                                                                                                                                           |                                                                                |                        |
| 4 | model-GMM                     | $\phi_M(\mathbf{x}) = \sum_{j=1}^{N_M} \phi_{M,j}(\mathbf{x})$                                                                                                                                                                                                                                                         | forward model to predict a density map from the model                          |                        |
| 5 | data-GMM                      | $\phi_D(\mathbf{x}) = \sum_{i=1}^{N_D} \phi_{D,i}(\mathbf{x})$                                                                                                                                                                                                                                                         | GMM fit of the experimental map                                                | GMM_FILE               |
| 6 | overlap of two GMM components | $ov_{M,j D,i} = \int d\mathbf{x} \phi_{M,j}(\mathbf{x}) \phi_{D,i}(\mathbf{x}) = \frac{\omega_{M,j} \omega_{D,i}}{(2\pi)^{3/2}  \Sigma_{M,j} + \Sigma_{D,i} ^{1/2}} \exp \left[ -\frac{1}{2} (\mathbf{x}_{M,j} - \mathbf{x}_{D,i})^T (\Sigma_{M,j} + \Sigma_{D,i})^{-1} (\mathbf{x}_{M,j} - \mathbf{x}_{D,i}) \right]$ | overlap of the j-th component of model-GMM with the i-th component of data-GMM |                        |
| 7 | total overlap                 | $ov_{MD,i} = \int d\mathbf{x} \phi_M(\mathbf{x}) \phi_{D,i}(\mathbf{x}) = \sum_{j=1}^{N_M} ov_{M,j D,i}$                                                                                                                                                                                                               | total overlap between model-GMM and i-th component of data-GMM                 | NL_CUTOFF<br>NL_STRIDE |



|    |                                                   |                                                                                                                                                                                                                                   |                                                                       |                    |
|----|---------------------------------------------------|-----------------------------------------------------------------------------------------------------------------------------------------------------------------------------------------------------------------------------------|-----------------------------------------------------------------------|--------------------|
| 8  | average total overlap                             | $\int d\mathbf{x} \left( \frac{1}{N} \sum_{r=1}^N \phi_M^r(\mathbf{x}) \right) \phi_{D,i}(\mathbf{x})$ $= \frac{1}{N} \sum_{r=1}^N ov_{MD,i}^r = \overline{ov}_{MD,i}$                                                            | total overlap of model-GMM averaged across the metainference replicas |                    |
| 9  | experimental overlap                              | $ov_{DD,i} = \int d\mathbf{x} \phi_D(\mathbf{x}) \phi_{D,i}(\mathbf{x})$                                                                                                                                                          | total overlap between data-GMM and i-th component of data-GMM         |                    |
| 10 | data-restraint for the i-th component of data-GMM | $E_{D,i}$ $= -k_B T \sum_r \log \left[ \frac{1}{2(ov_{DD,i} - \overline{ov}_{MD,i})} \right]$ $- k_B T \sum_r \log \left[ \text{erf} \left( \frac{ov_{DD,i} - \overline{ov}_{MD,i}}{\sqrt{2} \sigma_{r,i}^{SEM}} \right) \right]$ | Obtained from marginalization of Gaussian noise                       | SIGMA_MEAN<br>TEMP |
| 11 | total data-restraint                              | $E_D = \sum_{i=1}^{N_D} E_{D,i}$                                                                                                                                                                                                  | sum over all the components of the data-GMM                           | EMMI               |
| 12 | metainference energy function                     | $E_{MI} = E_{MD} + E_D$                                                                                                                                                                                                           |                                                                       |                    |

**Table S2.** Parameters of the forward model. The electron atomic scattering factors for C, N, O, and S neutral atoms were fit using a single Gaussian function  $f(s) = A_i \exp(-B_i s^2)$ . For each atom, we report the best fit of the A and B coefficients, the maximum value of  $s$  used in the fitting procedure ( $s_{max}$ ), the lower bound in resolution for the validity of the single-Gaussian approximation ( $d_{min}$ ), and the maximum error ( $err_{max}$ ), defined as maximum relative deviation of the fit from the tabulated atomic scattering factor in the range  $0 \leq s \leq s_{max}$ .

| Atom type | A    | B<br>[Å <sup>2</sup> ] | $s_{max}$<br>[1/Å] | $d_{min}$<br>[Å] | $err_{max}$ |
|-----------|------|------------------------|--------------------|------------------|-------------|
| C         | 2.50 | 15.15                  | 0.15               | 3.3              | 0.0101      |
| N         | 2.20 | 11.11                  | 0.17               | 2.9              | 0.0095      |
| O         | 1.98 | 8.60                   | 0.19               | 2.6              | 0.0093      |
| S         | 5.14 | 15.90                  | 0.15               | 3.3              | 0.0109      |

## Supplementary Figures

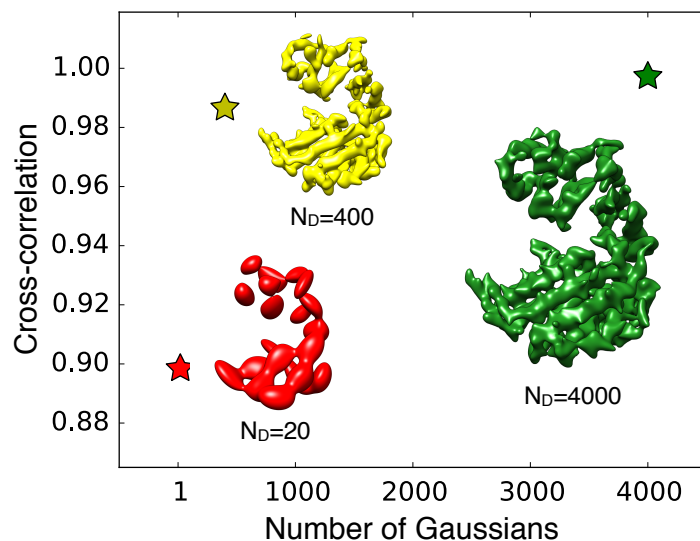

**Figure S1.** Cross-correlation of the GMM fit with the synthetic GroEL map as a function of the number of GMM components. The cross correlation was 0.90 for 20 Gaussian components (red star), 0.985 for 400 Gaussian components (yellow star), and 0.995 for 4000 Gaussian components (green star).

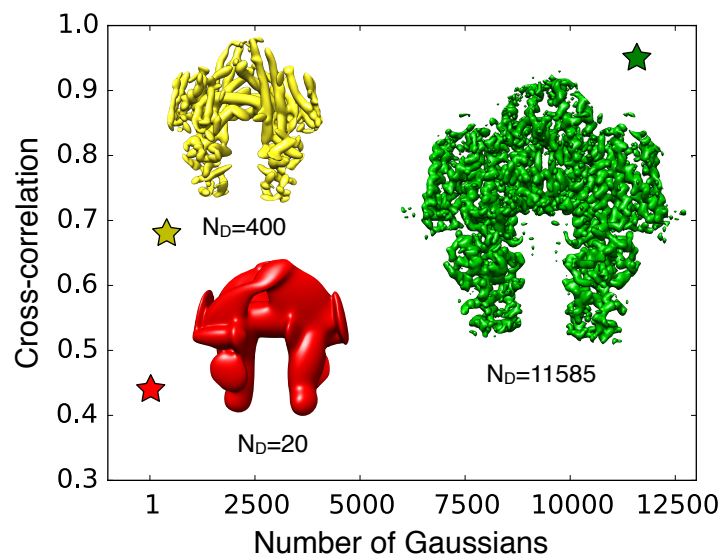

**Figure S2.** Cross-correlation of the GMM fit with the STRA6 experimental map (EMD code 8315) as a function of the number of GMM components. The cross correlation was 0.44 for 20 Gaussian components (red star), 0.68 for 400 Gaussian components (yellow star), and 0.97 for 11585 Gaussian components (green star).

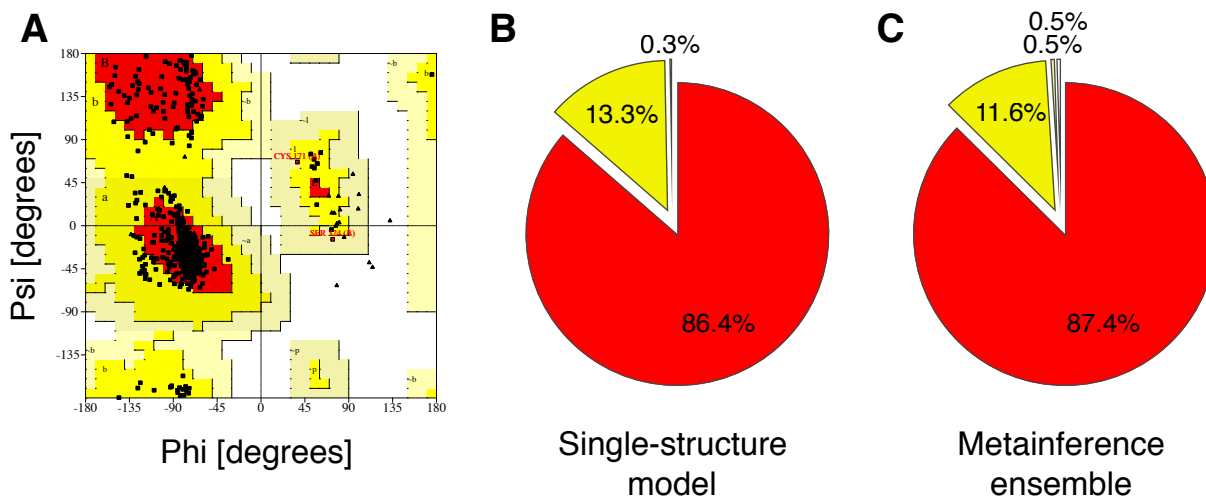

**Figure S3.** Stereochemistry assessment of the STRA6 single-structure deposited model and metainference ensemble. PROCHECK (8) was used to calculate the distributions of backbone dihedral angles across all residues and models. Dihedrals were then classified in 4 regions of the Ramachandran plot (A): residues in most favoured regions (red), in additional allowed regions (yellow), in generously allowed regions (light yellow), and in disallowed regions (white). The percentages of residues in each of the four regions is reported for the single-structure model (B) and the metainference ensemble (C).

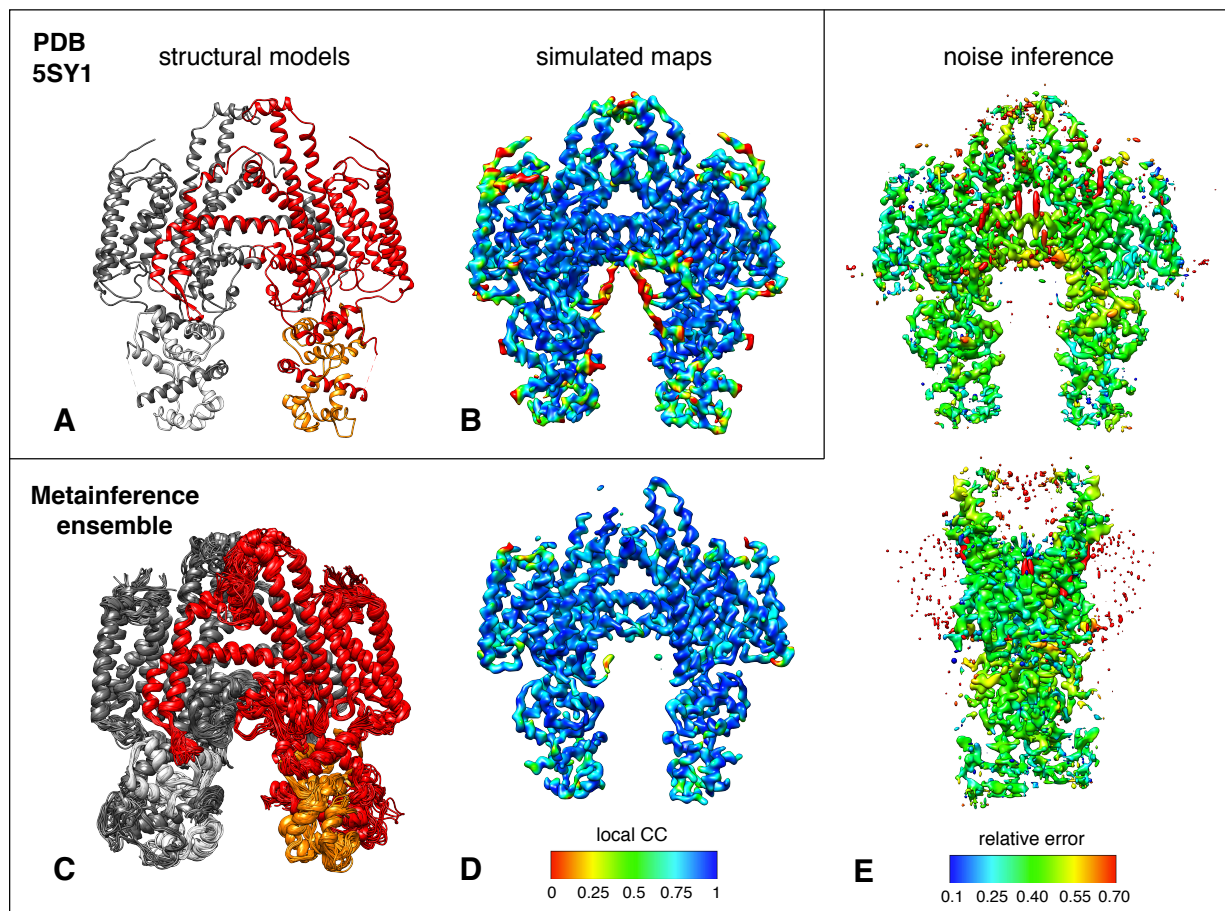

**Figure S4.** Application of the metainference method to the STRA6 membrane complex. We report the same analysis of **Figure 2** for the second independent metainference run.

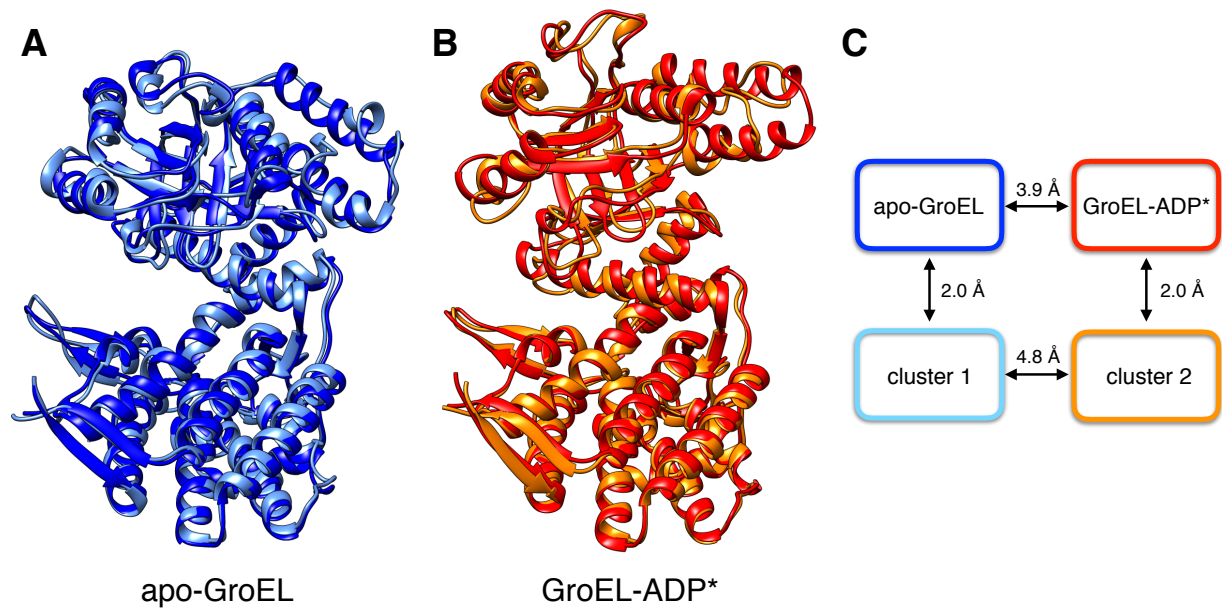

**Figure S5.** (A) Comparison of the crystal structure of apo GroEL (PDB code 1XCK, blue) with the center of cluster 1 of the metainference simulations (cyan). (B) Comparison of GroEL-ADP\* (red), a model built from the extended allosteric state adopted by GroEL in complex with ADP (PDB code 4KI8) with the center of cluster 2 of the metainference simulations (orange). (C) Summary of the backbone RMSD values between input structures and metainference models.



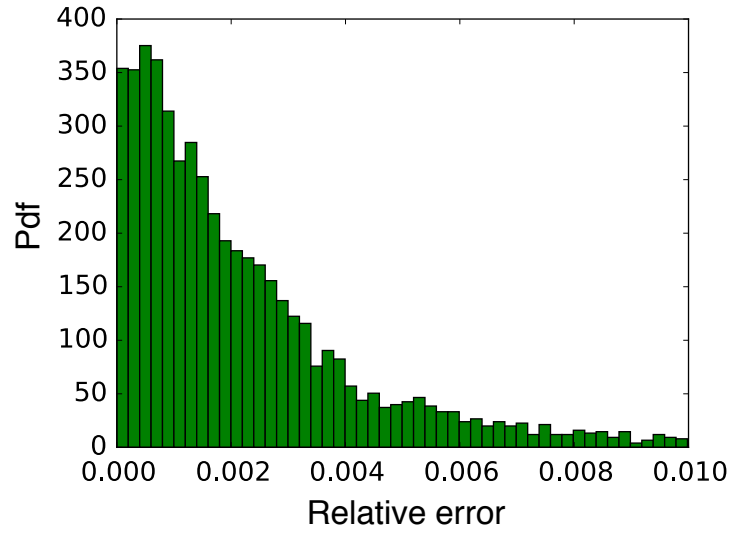

**Figure S6.** Distribution, in terms of a probability density function (Pdf), of the inferred level of relative noise across all components of the GroEL data GMM.

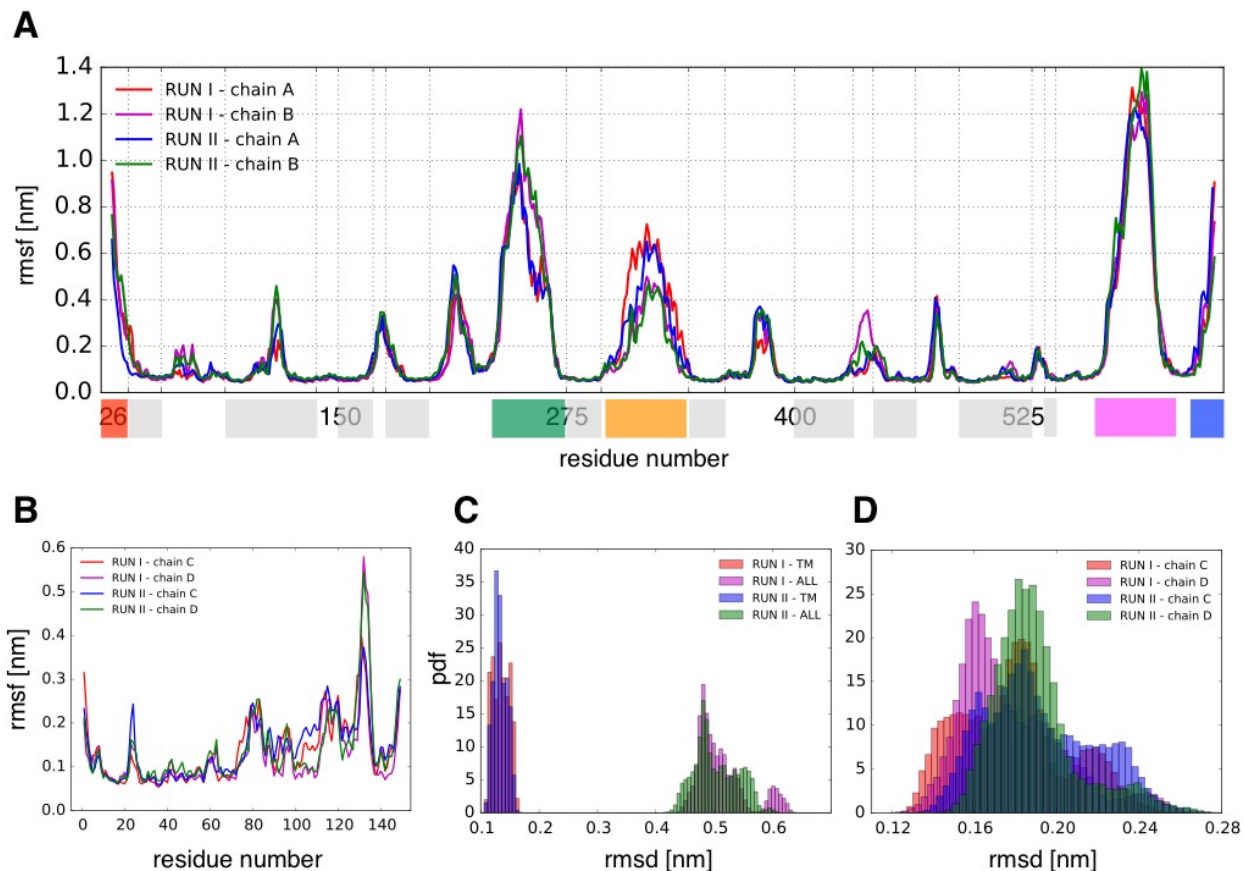

**Figure S7.** Root-mean-square fluctuation (rmsf) calculated on the  $C\alpha$  atoms of the STRA6 receptor (A), independently for the two identical chains of the dimer and in the two production runs (red, magenta, blue, and green lines). On the x-axis, specific regions of the STRA6 structure are highlighted along the sequence using different colors: the N-terminal domain (red), the TM domain (grey), the JM helix (green), the RBP-binding motif and LP (orange), the cytosolic loop (magenta), and the C-terminal domain (blue). Rmsf calculated on the  $C\alpha$  atoms of the calmodulin domain (B), independently for the two identical chains of the dimer and in the two production runs (red, magenta, blue, and green lines). Distribution of backbone RMSD from the single-deposited model calculated on the TM region (red and blue bars) and on the entire STRA6 receptor (magenta and green bars) for the two metainference production runs (C). In all cases,

prior to RMSD calculations, all conformations were aligned on the atoms belonging to the TM, defined by the region  $12.5 \text{ nm} < z < 15.0 \text{ nm}$  in the single-structure deposited model. Distribution of backbone RMSD from the single-deposited model calculated on the calmodulin domain for the two identical chains of the receptor and in the two production runs (D).

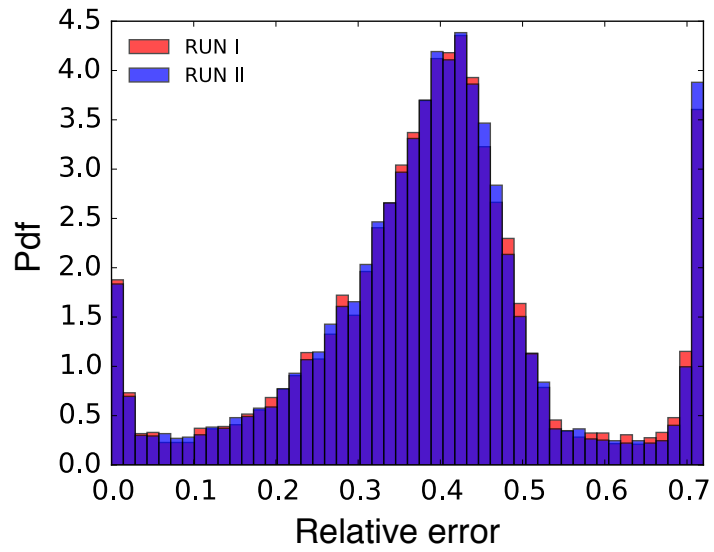

**Figure S8.** Distributions of the inferred level of relative noise across all components of the STRA6 data GMM in the two independent runs (red and blue bars for RUN I and RUN II, respectively).

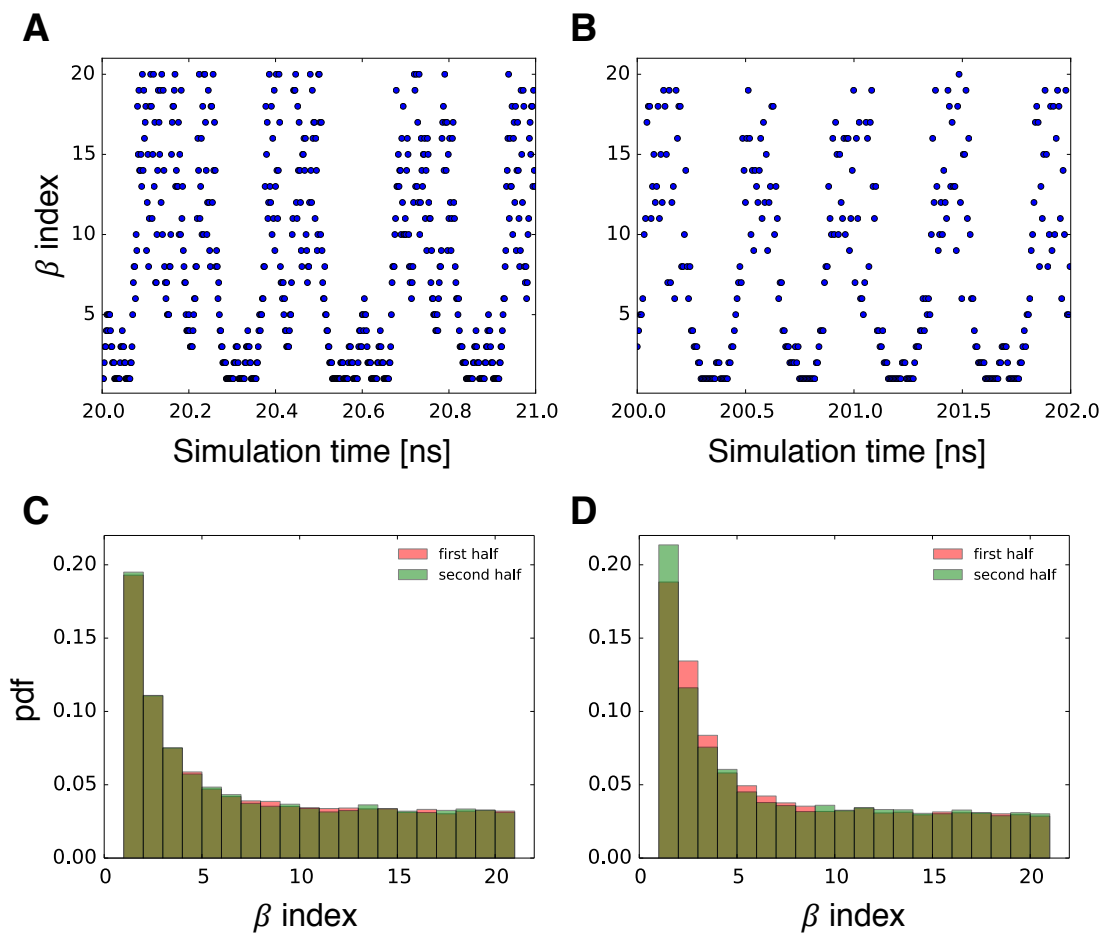

**Figure S9.** Efficient diffusion in  $\beta$  space during a representative segment of the GroEL (A) and STRA6 (B) metainference simulations. Distributions of the  $\beta$  index calculated over the first (red) and second (green) half of the GroEL (C) and STRA6 (D) simulations.

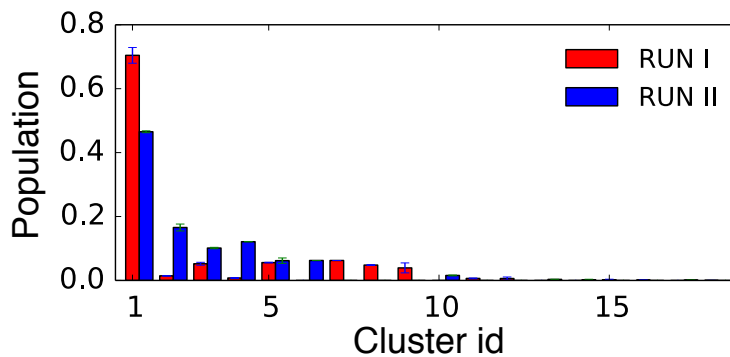

**Fig. S10.** Convergence assessment of the STRA6 metainference simulations. All conformations generated in the two production runs were clustered together using the GROMOS algorithm, using as metrics the backbone RMSD and a cutoff of 0.35 nm. The average and standard deviation of the populations calculated in the first and second half of each production run are reported (red and blue bars for RUN I and RUN II, respectively).
